# Supplementary material for: Paradoxical Evidence Integration in Rapid Decision Processes
Source: PLOS journal article supplement (doi:10.1371/journal.pcbi.1002382), 2012-02-16

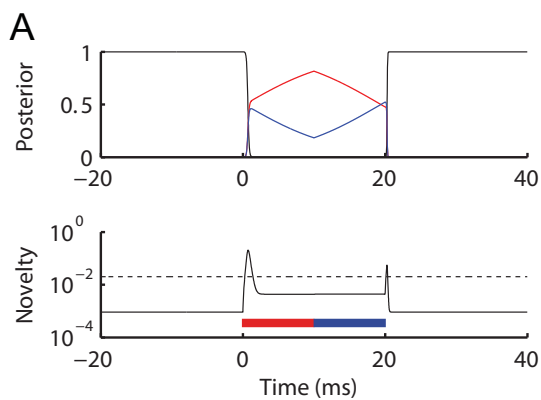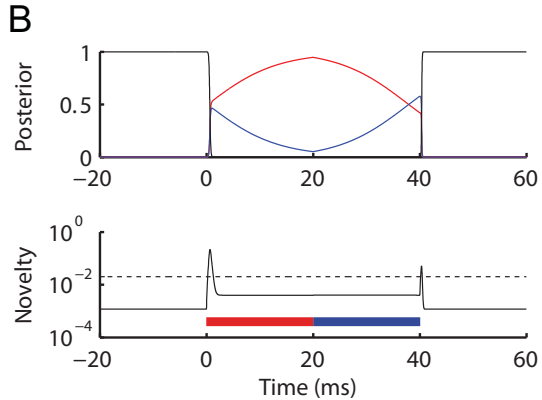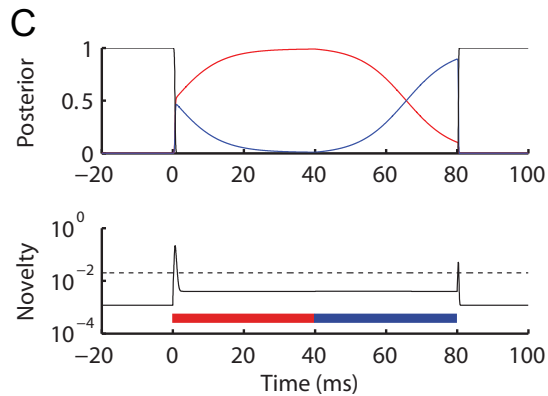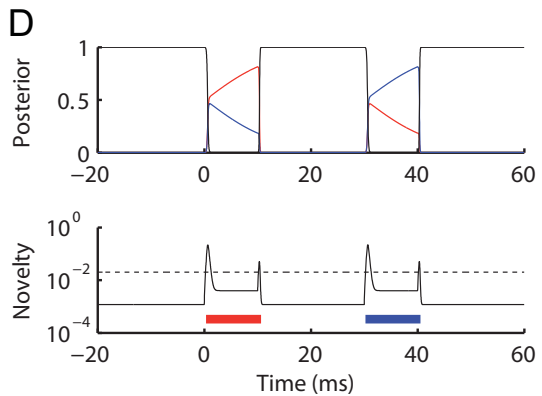

Supplement: S2 (10.1371/journal.pcbi.1002382.s002) [file journal.pcbi.1002382.s002]
