# Supplementary material for: Paradoxical Evidence Integration in Rapid Decision Processes
Source: PLOS journal article supplement (doi:10.1371/journal.pcbi.1002382), 2012-02-16
Supplement: S4 (10.1371/journal.pcbi.1002382.s004) [file journal.pcbi.1002382.s004]

301 Moved Permanently

# Moved Permanently

The document has moved here.

---

Apache Server at www.ploscompbiol.org Port 80
